# Supplementary material for: Pyrite oxidization accelerates bacterial carbon sequestration in copper mine tailings
Source: Copernicus journal article supplement (doi:10.5194/bg-16-573-2019), 2019-02-01
Supplement: Supplementary file 1 [file bg-16-573-2019-supplement.zip]

Archive with 3 entries (3 files):
- bg-16-573-2019-supplement-title-page.pdf
- supplementary table.doc
- supply materials.xlsx
