# Supplementary material for: Pyrite oxidization accelerates bacterial carbon sequestration in copper mine tailings
Source: Copernicus journal article supplement (doi:10.5194/bg-16-573-2019), 2019-02-01
Supplement: Supplementary file 1 [file bg-16-573-2019-supplement.zip › bg-16-573-2019-supplement-title-page.pdf]

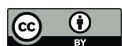

## *Supplement of*

# **Pyrite oxidization accelerates bacterial carbon sequestration in copper mine tailings**

**Yang Li et al.**

*Correspondence to:* Qingye Sun ([sunqingye@ahu.edu.cn](mailto:sunqingye@ahu.edu.cn))

- [bg-16-573-2019-supplement-title-page.pdf](#)
- [supplementary table.doc](#)
- [supply materials.xlsx](#)

The copyright of individual parts of the supplement might differ from the CC BY 4.0 License.
