# Supplementary material for: Pyrite oxidization accelerates bacterial carbon sequestration in copper mine tailings
Source: Copernicus journal article supplement (doi:10.5194/bg-16-573-2019), 2019-02-01
Supplement: Supplementary file 1 [file bg-16-573-2019-supplement.zip › supply materials.xlsx]

## Sheet: YM_FeS2_cbbL
CsCl Buoyant Density (g mL-1)in 13C-treated samples
	cbbL gene abundance g-1 d.w.s.
	repeat1	repeat2	repeat3
1.75362
1.75021
1.74907	1714.2	3545.65	6295.53
1.74565	3124.15	3489.42	3666.73
1.74109	96849.2	203000	220402
1.73766	297061	311304	302159
1.73192	26819.6	24174.1	29137
1.72848	180573	142544	116764
1.72503	375695	411596	574232
1.71926	610613	633696	747998
1.7158	55502.6	65565.9	54692.8
1.71117	30446.9	32181.5	35771.6
1.70885	4068.94	6496.25	7664.42
1.70653	5619.02	7025.8	8493.56
1.69721
CsCl Buoyant Density (g mL-1)in 12C-treated samples
	cbbL gene abundance g-1 d.w.s.
	repeat1	repeat2	repeat3
1.75248
1.75134
1.74907	2045.94	1885.43	27205.8
1.74565	5610.25	12602.6	45210.2
1.74337	3246.57	1103.2	26545.5
1.7388	3748.64	9231.74	30823.2
1.73536	3518.8	39893.5	6437.31
1.73078	1688.93	914.89	105379
1.72618	14742.4	6674.81	61927.6
1.72157	954375	1.18379e+06	884858
1.71811	467701	764037	66196.4
1.71464	443941	113261	114635
1.71117	9395.98	1530.07	24473.5
1.70885	985.885	1797.28	13541.2
1.7042

## Sheet: SM_FeS2_cbbL
CsCl Buoyant Density (g mL-1)in 13C-treated samples
	cbbL gene abundance g-1 d.w.s.
	repeat1	repeat2	repeat3
1.75362
1.75248
1.74793	187.464	118.502	241.819
1.74679	124.148	189.422	129.395
1.74223	2849.17	2199.93	2799.24
1.7388	15283.1	19001.3	18418.7
1.73422	139526	110112	119629
1.72848	85573.1	42543.8	28024.9
1.72503	6695.2	8595.66	8254.17
1.72042	290613	233696	180843
1.71695	145503	275566	183818
1.71232	3446.95	3081.48	3921.92
1.70885	238.937	396.253	366.126
1.70653	319.018	425.796	482.151
1.69371
CsCl Buoyant Density (g mL-1)in 12C-treated samples
	cbbL gene abundance g-1 d.w.s.
	repeat1	repeat2	repeat3
1.75134
1.75021
1.74793	1545.32	1934.61	2373.12
1.74565	6171.77	12346.7	18425.6
1.74223	1745.52	3275.9	4626.26
1.7388	2744.33	1894.51	11524.2
1.73536	2539.33	6374.55	10972.2
1.73078	939.056	2348.95	649.826
1.72618	4780.17	1135.29	4072.31
1.72272	550635	264240	975049
1.71811	223326	214065	779810
1.71464	83090.3	12413.7	66430.4
1.71117	1356.11	1319.82	1727.28
1.70885	950.916	1126.2	804.66
1.7042

## Sheet: YM_FeS2_cbbM
CsCl Buoyant Density (g mL-1)in 13C-treated samples
	cbbM gene abundance g-1 d.w.s.
	repeat1	repeat2	repeat3
1.75362
1.75021
1.74907	798.494	657.539	1825.81
1.74565	1308.9	2537.67	2915.27
1.74109	4335.51	4583.73	6594.73
1.73766	22779.7	15707.9	16699
1.73192	3413.8	3880.97	4202.04
1.72848	2540.36	966.093	1328.78
1.72503	12947.9	11934.5	12620.9
1.71926	23797.2	27855.6	27926.4
1.7158	13840.7	14564.3	12389.7
1.71117	2239.85	2492.71	2951.61
1.70885	3190.89	2495.52	3871.06
1.70653	2578.63	1604.43	896.482
1.69721
CsCl Buoyant Density (g mL-1)in 12C-treated samples
	cbbM gene abundance g-1 d.w.s.
	repeat1	repeat2	repeat3
1.75248
1.75134
1.74907	276.805	928.846	1486.12
1.74565	458.646	571.199	499.82
1.74337	298.72	1120.31	429.775
1.7388	947.602	1089.73	2390.99
1.73536	3132.1	3574.96	1115.13
1.73078	3093.69	3707.6	5871.82
1.72618	6639.47	8643.34	14601.8
1.72157	70226.3	58198.5	91670.8
1.71811	39140.2	8897.15	51243.4
1.71464	9784.89	10520.7	8515.93
1.71117	1249.05	686.199	5255.28
1.70885	3207.63	1455.26	445.527
1.7042

## Sheet: SM_FeS2_cbbM
CsCl Buoyant Density (g mL-1)in 13C-treated samples
	cbbM gene abundance g-1 d.w.s.
	repeat1	repeat2	repeat3
1.75362
1.75248
1.74793	113.947	103.541	114.281
1.74679	257.467	292.122	189.661
1.74223	146.608	99.2839	114.795
1.7388	1671.62	3671.44	2995.32
1.73422	6074.42	8442.15	7655.11
1.72848	174.174	181.264	138.271
1.72503	168.394	253.884	152.401
1.72042	15142.4	15936.8	21498.9
1.71695	14542.3	6252.86	14463.8
1.71232	1248.6	1185.74	2216.2
1.70885	153.763	170.679	69.3685
1.70653	45.3144	27.8833	39.3196
1.69371
CsCl Buoyant Density (g mL-1)in 12C-treated samples
	cbbM gene abundance g-1 d.w.s.
	repeat1	repeat2	repeat3
1.75134
1.75021
1.74793	1547.62	1811.23	720.931
1.74565	340.894	590.098	813.432
1.74223	245.559	179.236	291.411
1.7388	1097.81	774.952	585.504
1.73536	965.153	1040.08	178.845
1.73078	1234.93	694.841	2553.01
1.72618	1214.74	1215.51	9745.26
1.72272	24774.1	20460	72951.8
1.71811	20098.3	13629.7	60041.8
1.71464	553.773	860.404	1092.54
1.71117	291.697	618.835	2931.69
1.70885	930.546	682.762	2702.84
1.7042
